# Supplementary material for: Exploring the Diverse Functional and Regulatory Consequences of Alternative Splicing in Development and Disease
Source: Front Genet. 2021 Nov 24;12:775395. doi: 10.3389/fgene.2021.775395 (PMC8652244; doi:10.3389/fgene.2021.775395)
Supplement: Supplementary file 1 [file Table1.XLSX]

## Sheet: NMD-sensitive genes in Metazoa
Table S1. List of NMD-sensitive or PTC-containing genes across Metazoa
Human	Mouse	Drosophila	C. elegans
ANKMY1	1810026B05Rik	5-HT2A	aat-4
A1BG-AS1	2210018M11Rik	Aasdh	abu-12
A2MP1	2310035C23Rik	ACXA	acdh-2
AACSP1	2410004B18Rik	ACXC	acdh-6
AADACP1	4930506M07Rik	AdamTS-B	acs-2
AAMDC	5730419I09Rik	Adar	adr-1
AARSD1	8030462N17Rik	Afg3l2	agr-1
AASDHPPT	Abcc5	Agpat3	agt-1
AASS	Abhd12	alph	AH10.4
AATBC	Acbd5	alpha-Cat	anr-24
AATK	Acin1	alpha-Est3	arf-1.1
ABCA10	Acot8	AMPdeam	arl-7
ABCA11P	Acox1	Ank2	arrd-20
ABCA13	Actn4	Arl4	arrd-21
ABCA17P	Actr1a	Ars2	arrd-23
ABCA2	Actr2	Asator	asd-1
ABCA5	Adamts6	Asx	asna-2
ABCA7	Adss	Atpalpha	asp-11
ABCB11	Aes	Awh	asp-12
ABCB4	Aga	Axn	asp-17
ABCB6	Agap3	B-H1	B0024.4
ABCB8	Agbl5	B52	B0034.7
ABCB9	Ahctf1	bip1	B0035.18
ABCC10	Ahcyl1	bol	B0035.3
ABCC12	AI314180	bru2	B0238.1
ABCC3	Ak2	byn	B0250.12
ABCC4	Akap8	Ca-beta	B0250.4
ABCC5	Akap8l	Cad86C	B0250.7
ABCC6	Alg1	CAHbeta	B0284.5
ABCC6P1	Alkbh1	Calx	B0285.3
ABCC8	Alkbh3	CapaR	B0285.4
ABCD4	Alkbh6	Caper	B0416.10
ABCE1	Alpk1	caz	B0495.8
ABHD1	Angel2	cdi	B0495.9
ABHD10	Ankfy1	Cep135	B0507.9
ABHD11	Ankrd10	CG10175	B0511.2
ABHD12	Ankrd12	CG10205	B0545.4
ABHD14A	Ap1b1	CG10265	bath-12
ABHD14A-ACY1	Ap1s2	CG10344	bath-14
ABHD14B	Ap2m1	CG10486	bath-18
ABHD16A	Ap3s1	CG10587	bath-25
ABHD17A	Apc	CG1090	bath-6
ABHD5	Apobec1	CG10948	bbs-8
ABI1	Apoe	CG11034	BE0003N10.3
ABI2	Aprt	CG11168	best-8
ABR	Arfip2	CG11180	bir-2
ABRAXAS1	Arfrp1	CG11227	bli-2
ABTB1	Arglu1	CG11286	btb-1
ACAA1	Arhgap15	CG11406	btb-16
ACACA	Arhgap21	CG11456	btb-21
ACACB	Arhgef40	CG11695	btb-3
ACAD10	Arid4a	CG11710	btb-4
ACAD11	Arid4b	CG11790	btb-9
ACAD8	Arih1	CG12520	C01B9.5
ACAD9	Arih2	CG12567	C01G10.10
ACADM	Arpc1b	CG1271	C01G12.12
ACADVL	Arpp21	CG12824	C01H6.6
ACAP3	Ascc2	CG12857	C02B8.1
ACAT1	Ash1l	CG12914	C02F4.4
ACBD4	Asxl3	CG12929	C02G6.1
ACD	Atad2b	CG12983	C03A3.1
ACE	Atf7	CG13168	C03B1.7
ACER3	Atg2a	CG13616	C03H5.6
ACHE	Atg3	CG13707	C04E12.2
ACIN1	Atl2	CG13743	C04E12.4
ACOT8	Atp11c	CG13771	C05B5.5
ACOX1	Atp5j2	CG13784	C05B5.9
ACOX2	Atp5o	CG13887	C05C8.1
ACOXL-AS1	Atp6v0a1	CG13896	C05E7.1
ACP1	Atp6v0d1	CG1407	C06C3.4
ACP2	Atp6v0e	CG14142	C08B6.10
ACP6	Atp6v1c1	CG14218	C08F11.13
ACRBP	Atp6v1e1	CG14260	C08F11.6
ACSBG1	Aup1	CG14408	C08F11.7
ACSBG2	Auts2	CG14450	C09E7.6
ACSF2	Azin1	CG14605	C10B5.1
ACSF3	Bap1	CG14642	C12D8.1
ACSL6	Bat3	CG14657	C14B1.8
ACSM2A	BC024479	CG14691	C14C6.12
ACSS2	BC031181	CG14693	C16A11.3
ACSS3	Bcas3	CG14744	C16A11.5
ACTG1	Bclaf1	CG14823	C16C4.18
ACTG1P20	Bicd1	CG14881	C16C8.16
ACTG1P4	Birc6	CG14985	C16C8.20
ACTL6A	Bnip2	CG14995	C17B7.2
ACTL6B	Bod1l	CG1513	C17C3.1
ACTR10	Bptf	CG15905	C17C3.15
ACTR2	Brd2	CG1620	C17G1.5
ACTR3	Brd8	CG33125	C17H12.6
ACTR3B	Btbd1	CG33233	C23F12.4
ACTR3C	Bub3	CG33253	C23G10.5
ACTR6	C030046E11Rik	CG33523	C24A3.2
ACY1	C2cd3	CG3355	C24H12.2
ACYP1	C530008M17Rik	CG33655	C25A1.4
ACYP2	Cacna1a	CG3376	C25A6.1
ADA	Cacna1d	CG34171	C25H3.12
ADAL	Cacnb2	CG34204	C26B9.1
ADAM15	Cacnb4	CG34232	C26B9.3
ADAM19	Cadm1	CG34342	C27A7.2
ADAM1A	Cadps	CG34398	C27A7.3
ADAM28	Cald1	CG3566	C27C7.1
ADAM5	Camk2d	CG3632	C27D6.3
ADAMTS10	Camk2g	CG3635	C28H8.2
ADAMTS13	Camta1	CG40228	C29E4.13
ADAMTS16	Camta2	CG40485	C29F9.3
ADAMTS17	Caprin1	CG4218	C29F9.4
ADAMTS18	Cars2	CG42268	C30E1.9
ADAMTS19	Cask	CG42404	C30H6.5
ADAMTS6	Casp2	CG42449	C32E12.4
ADAMTS7P1	Ccar1	CG42531	C32H11.6
ADAMTS9	Ccdc111	CG42654	C33C12.7
ADAMTS9-AS1	Ccdc130	CG4266	C33E10.8
ADAMTSL1	Ccdc21	CG42676	C34C12.12
ADAP2	Ccnl1	CG42691	C34C6.2
ADARB1	Ccnt2	CG42724	C34D4.10
ADAT1	Cd2ap	CG42748	C34E10.10
ADCK1	Cdc37l1	CG42764	C34F11.8
ADCK5	Cdc42bpa	CG43078	C35A5.11
ADCY10	Cdc73	CG43127	C35B1.2
ADCY10P1	Cdk14	CG43233	C35D10.8
ADCY2	Cdk2ap2	CG43373	C35D6.5
ADCY4	Celf1	CG44085	C36A4.12
ADCY9	Celf2	CG44102	C37C3.2
ADD1	Celf3	CG4452	C37C3.7
ADD3-AS1	Celf4	CG45105	C38C6.3
ADGB	Celsr3	CG4558	C39B5.10
ADGRE2	Cenpa	CG4650	C40H1.2
ADGRE4P	Cep250	CG4678	C40H5.8
ADGRG6	Cept1	CG4716	C42C1.13
ADGRV1	Cfb	CG4822	C43H6.4
ADH4	Cfl2	CG4836	C44C10.5
ADHFE1	Chd2	CG4896	C44H9.6
ADIRF	Chd6	CG5004	C45E5.3
ADM5	Chd9	CG5071	C46E10.9
ADNP-AS1	Chka	CG5316	C46F11.4
ADORA2A	Chkb	CG5348	C46G7.5
ADORA2A-AS1	Chn1	CG5504	C46H3.1
ADPGK	Cinp	CG5674	C48D1.5
ADPRM	Ckmt1	CG5849	C49C3.3
ADRA1A	Clasp1	CG5928	C49F8.3
ADSL	Clasp2	CG6171	C49H3.12
ADSSL1	Clcn4-2	CG6340	C50D2.10
ADTRP	Clcn7	CG6569	C50E10.1
AEBP1	Clk1	CG6614	C51E3.9
AFF1-AS1	Clk4	CG6686	C52D10.10
AFG1L	Clock	CG6695	C52G5.2
AFG3L1P	Clptm1	CG6739	C53A5.13
AFMID	Clta	CG6765	C53C11.1
AFTPH	Clybl	CG7206	C53H9.2
AGA	Cnot1	CG7990	C54C8.4
AGAP11	Cnot2	CG8079	C54D10.12
AGAP3	Cntln	CG8475	C55A6.10
AGAP5	Cops3	CG8726	C55B7.3
AGAP6	Cops5	CG8927	C56A3.10
AGAP7P	Cops7b	CG9368	C56C10.4
AGAP9	Cox7c	CG9410	C56E6.4
AGBL2	Cpsf4	CG9664	C56G3.2
AGBL3	Cpsf7	CG9674	cal-6
AGBL4	Creb1	CG9775	cars-2
AGBL4-IT1	Crebzf	CG9795	cbl-1
AGBL5	Creg1	CG9961	cbp-2
AGGF1	Crlf2	chn	cbp-3
AGK	Csnk1e	ci	cdc-26
AGO1	Csnk1g2	cic	cdr-4
AGO2	Csrnp3	clumsy	CE7X_3.2
AGO3	Ctage5	cmpy	ceeh-1
AGPAT4	Ctdspl2	Cog6	ceh-19
AGPAT4-IT1	Ctla2a	corn	ceh-22
AGPAT5	Ctnnal1	Cp7Fb	ceh-6
AGTRAP	Ctsa	Cpr49Ac	ceh-88
AHCTF1	Ctsd	Cpsf5	cgr-1
AHI1	Cttnbp2	cpx	cgt-2
AHSA2P	Cul3	Crk	che-13
AI314180	Cux2	CtIP	chil-13
AIF1L	Cxcl16	Culd	chil-3
AIFM1	D10Jhu81e	CycJ	chil-7
AIFM3	D4Wsu53e	Cyp6a19	cin-4
AIG1	D6Wsu116e	Dark	clc-1
AIMP2	Dazap1	dec	clec-149
AJM1	Dcaf10	Dic3	clec-17
AK1	Dcaf5	Dic4	clec-180
AK9	Dcaf6	didum	clec-221
AKAP10	Dcun1d4	Dlg5	clec-222
AKAP17A	Ddx17	Dredd	clec-23
AKAP7	Ddx39	Dtd	clec-4
AKAP8	Ddx46	Duba	clec-47
AKAP8L	Ddx5	Dup99B	clec-51
AKNAD1	Dek	eas	clec-52
AKR1B1	Dennd1a	Eato	clec-60
AKR1C6P	Dhrs3	eIF4EHP	clec-66
AKR1C8P	Dhx15	Ekar	clec-69
AKR1E2	Dhx30	Eph	clec-75
AKR7A2	Dhx9	ewg	clec-82
AKT1S1	Dis3	f-cup	cnnm-4
AKT2	Dkc1	FeCH	coa-6
ALB	Dlg1	Fer1HCH	col-111
ALDH16A1	Dlg2	Fhos	col-129
ALDH1L1	Dlg3	Fibp	col-131
ALDH1L1-AS2	Dlgap1	Flacc	col-144
ALDH1L2	Dnajc13	flz	col-145
ALDH2	Dnajc24	fred	col-172
ALDH3A1	Dnajc25	Fur1	col-175
ALDH3A2	Dnajc5	Fur2	col-176
ALDH7A1	Dnajc7	GABA-B-R3	col-182
ALDH8A1	Dnm1	GalT1	col-36
ALDOC	Dnm2	gd	col-53
ALG1	Dock10	GEFmeso	col-54
ALG10	Dock9	glo	col-55
ALG10B	Dpp7	glob1	col-58
ALG12	Dpp8	Glut1	col-76
ALG13	Drosha	Gpo3	col-77
ALG14	Dscr3	gprs	col-81
ALG1L2	Dst	Gr61a	col-84
ALG2	Dtnbp1	Grik	col-99
ALG3	Dusp11	Grip84	coq-3
ALG9	Dzip1	Gss1	cpg-8
ALKBH1	Edc4	Gss2	cpi-1
ALKBH3	Edf1	gukh	cpn-2
ALKBH4	Eef1a1	GXIVsPLA2	csn-2
ALKBH6	Eef1b2	Gyg	csp-2
ALKBH8	Eef2	Hdc	cul-6
ALMS1	Eif2c3	Hel25E	cutl-14
ALMS1-IT1	Eif3k	heph	cutl-28
ALMS1P1	Eif4a2	HisCl1	cyk-7
ALOX12-AS1	Eif4g2	HnRNP-K	cyl-1
ALOX12P2	Ell2	HP4	cyp-14A5
ALOX15P1	Eno1	Ir76a	cyp-32B1
ALS2	Epc1	Irbp	cyp-33D1
ALS2CL	Epn1	Jabba	cyp-35A2
ALS2CR12	Eprs	Kank	cyp-35C1
ALYREF	Eps15	Klp67A	cyp-43A1
AMACR	Eps15l1	Kul	D1022.4
AMD1	Erc1	l(1)G0020	D1037.1
AMDHD1	Erc2	lbl	D1054.6
AMDHD2	Ergic1	lig	D2096.7
AMPD1	Eri3	List	DC2.5
AMPD2	Erp44	lok	ddo-1
AMPD3	Esco1	LRR	ddo-2
AMPH	Etnk1	Lsd-1	dhhc-3
AMT	Etv1	M6	dip-2
AMY2B	Eva1c	mbl	dod-6
AMZ2P1	Ewsr1	Mbs	dpy-20
ANAPC1	Exosc5	MED1	dur-1
ANAPC10	Eya1	MED18	dyla-1
ANAPC16	Eya3	Mf	E01A2.2
ANAPC1P1	Ezh2	MFS17	E01A2.5
ANAPC4	Fam105b	mge	E02C12.8
ANAPC5	Fam120a	mGluR	E02H1.1
ANGEL1	Fam125a	Mical	E02H9.2
ANGEL2	Fam126b	Mlf	E03A3.10
ANK1	Fam13b	MsrA	ears-2
ANK3	Fam149b	mthl15	ech-2
ANKAR	Fam178a	mtt	EEED8.13
ANKDD1A	Fam45a	mud	EEED8.18
ANKFY1	Fam76b	Myo95E	EEED8.3
ANKIB1	Far1	nAChRbeta2	EGAP9.4
ANKK1	Fbxo18	NaCP60E	egg-2
ANKLE1	Fbxo38	nahoda	egl-38
ANKLE2	Fbxo8	Nep5	egl-44
ANKRD10	Fbxw11	NetA	eif-2D
ANKRD11	Fgfr1	NFAT	elo-4
ANKRD12	Fgfr2	NKAIN	ent-6
ANKRD13D	Fhod1	nkd	enu-3.1
ANKRD18A	Fis1	Nos	ercc-1
ANKRD18CP	Flot1	NPFR	F01D5.6
ANKRD18DP	Flot2	nSyb	F01G10.10
ANKRD19P	Fmnl3	Nxt1	F01G12.1
ANKRD20A1	Fmr1	Opa1	F02C12.3
ANKRD20A11P	Fn1	Or63a	F02C12.7
ANKRD20A2	Fnbp4	pan	F02D10.3
ANKRD20A3	Foxk2	par-1	F07A5.4
ANKRD20A3_locus1	Foxp1	para	F07C6.3
ANKRD20A4	Fubp1	pck	F07E5.9
ANKRD20A4-ANKRD20A20P	Fubp3	Pcmt	F07F6.2
ANKRD20A5P	Fus	Pde8	F08B4.3
ANKRD26P3	Gad1	Pep	F09D12.2
ANKRD27	Ggnbp2	PGRP-LA	F09F3.8
ANKRD28	Gli3	pHCl-1	F09F9.2
ANKRD29	Gli3	Pis	F10E9.4
ANKRD30BL	Glrx3	PKD	F10G2.7
ANKRD33B	Gls	pns	F11D5.1
ANKRD34C-AS1	Gm15427	polyph	F11E6.9
ANKRD36B	Gm3258	ppk29	F13G3.6
ANKRD36BP2	Gnl2	ProRS-m	F13H6.4
ANKRD45	Gns	Prp39	F13H8.9
ANKRD49	Golga4	ps	F14D12.1
ANKRD6	Got1	Pten	F14D2.14
ANKS3	Gp49a	Ptr	F14D2.5
ANKUB1	Gpatch8	puf	F14D2.8
ANKZF1	Gpcpd1	Rack1	F14E5.1
ANLN	Gphn	Ranbp16	F15B9.8
ANO4	Gpi1	Rbfox1	F15D4.5
ANO6	Gpm6b	Rbp	F15D4.6
ANP32A	Gramd1a	Rbp1	F15H9.7
ANP32A-IT1	Gria2	rdgA	F16A11.2
ANPEP	Gria3	ReepA	F16B4.5
ANTXRLP1	Gria4	rhea	F16F9.1
ANXA2	Grn	rho-6	F16G10.15
ANXA2R	Gsta3	RhoGAP100F	F16H6.7
ANXA4	Gtf2a2	RhoGAP5A	F17A9.5
ANXA5	Gtf2f2	RIC-3	F18A11.2
ANXA8	Gtf2i	rl	F18A11.6
AOAH	H13	RluA-1	F18C5.9
AOAH-IT1	H19	RluA-2	F18F11.4
AP1AR	H2-M3	row	F19B2.12
AP1G2	H2-T22	Rph	F19B2.5
AP1M2	H2afy	RpL10Ab	F19F10.12
AP1S2	Hdac10	RpL13A	F19G12.8
AP1S3	Hdgf	RpL3	F20C5.5
AP2A2	Hecw1	RpS5b	F20G2.7
AP2B1	Herc3	RpS9	F21A9.1
AP3B2	Herc4	rump	F21F8.5
AP3M1	Hexa	rut	F21F8.6
AP3S1	Hira	Saf-B	F22D6.8
AP3S2	Hmgxb4	scaf6	F22D6.9
AP4E1	Hnrnpa1	Scamp	F22E12.3
AP4M1	Hnrnpa2b1	Sdc	F22E5.13
AP5M1	Hnrnpc	SecS	F22G12.8
AP5Z1	Hnrnpd	Sema1a	F23D12.9
APBB2	Hnrnph1	SF1	F25E5.8
APBB3	Hnrnph3	Sf3b3	F25G6.9
APC	Hnrnpk	shot	F25H2.12
APCDD1	Hnrnpl	sif	F26F2.15
APCDD1L-DT	Hnrnpu	Sin3A	F26F4.8
APEH	Hnrpdl	Slip1	F27B3.7
APH1A	Hnrpll	smash	F27D4.3
APH1B	Hook3	smog	F28C6.5
APLF	Hpcal1	SmydA-4	F28F8.10
APOA2	Hps5	snk	F28F8.9
APOBEC3C	Hsf1	sol	F28G4.3
APOBEC3D	Hspa9	Sp1	F29D10.3
APOC1P1	Hyou1	sp3	F29G9.7
APOL1	Ide	sPLA2	F30A10.2
APOL3	Idua	spn-A	F31E9.3
APOLD1	Ifi203	srp	F31F4.1
APOM	Il4ra	ssx	F31F7.1
APOO	Ilf3	Start1	F32B4.4
APOPT1	Ilk	Stim	F33A8.7
APPBP2	Ilkap	Strn-Mlck	F33E2.4
APPL2	Inadl	su(w[a])	F33E2.8
APRT	Ints6	Svil	F33H12.7
APTR	Ipcef1	Sxl	F35A5.8
APTX	Iqgap1	Syt1	F35E12.4
AQP1	Irak1	Syt7	F35E12.9
AQP3	Irf3	Tace	F35E2.7
AQP4	Itfg3	TAF1B	F35F10.4
AQP4-AS1	Itpr1	Tao	F36G9.4
AQP7	Itsn1	Targ	F37A4.3
AQR	Jak1	tau	F37C12.21
ARAP2	Jmjd6	TBPH	F37H8.2
AREL1	Kars	THADA	F39E9.1
ARF3	Kcnma1	tim	F39F10.4
ARF4	Kdm2b	Tip60	F40D4.17
ARF4-AS1	Kdm3a	TM4SF	F40E3.7
ARFGAP1	Khdrbs1	tra	F40H3.3
ARFGAP2	Kif1c	tra2	F40H6.6
ARFIP2	Klf6	trp	F41C3.6
ARFRP1	Klhdc10	Trpm	F43D2.3
ARGLU1	Klhl13	ttv	F43G6.3
ARHGAP11B	Kpna1	Ucp4A	F44F1.4
ARHGAP15	Krcc1	Ucp4B	F44F1.5
ARHGAP17	Lamp2	unc-4	F44G3.10
ARHGAP21	Lars	unc79	F45B8.5
ARHGAP22	Lass2	Vps13B	F45D11.1
ARHGAP22-IT1	Lats1	wapl	F45D3.1
ARHGAP23	Lats2	wgn	F46B6.4
ARHGAP25	Lcorl	wupA	F46C8.8
ARHGAP26	Lgals1	Xe7	F46F11.7
ARHGAP26-IT1	Lin7a	Yippee	F49E8.7
ARHGAP27	Loh12cr1	ZAP3	F52C6.12
ARHGAP27P1	Lphn1	zfh2	F52C6.13
ARHGAP27P1-BPTFP1-KPNA2P3	Lrfn5	zip	F52C6.3
ARHGAP30	Lrrc1	Zn72D	F52C6.4
ARHGAP42	Lrrc7	ZnT33D	F52E1.5
ARHGAP45	Lsm6		F52H2.7
ARHGAP5	Luc7l		F53A3.7
ARHGAP6	Luc7l2		F53B2.7
ARHGAP8	Luc7l3		F53B2.8
ARHGDIA	Ly6a		F53F4.8
ARHGEF10	Macf1		F54C8.4
ARHGEF10L	Map2k2		F54D10.4
ARHGEF2	Mapk14		F54G2.4
ARHGEF26-AS1	Mapkapk3		F55A11.11
ARHGEF3	Mapt		F55A3.2
ARHGEF34P	Matr3		F55G11.1
ARHGEF40	Max		F55G11.10
ARHGEF7	Mbd2		F55G11.3
ARHGEF9	Mbnl1		F56A8.9
ARHGEF9-IT1	Mbtd1		F56B3.2
ARID1A	Mbtps1		F57C12.6
ARID1B	Mcm7		F57G9.6
ARID3A	Mdm2		F57H12.6
ARID4A	Meaf6		F58G1.2
ARID4B	Mecp2		F58H1.2
ARIH1	Mecr		F58H1.3
ARIH2	Meis2		F59A7.7
ARL1	Memo1		F59A7.8
ARL13B	Metap1d		F59B2.3
ARL16	Mff		F59D6.7
ARL2	Mgea5		F59E12.6
ARL2-SNX15	Mid2		F59G1.4
ARL5A	Mier1		F59H6.3
ARL6	Mina		fat-5
ARL6IP4	Mkln1		fbxa-1
ARL6IP6	Mll3		fbxa-104
ARL9	Mll5		fbxa-106
ARMC10	Mocs1		fbxa-11
ARMC5	Morc4		fbxa-121
ARMC6	Morf4l1		fbxa-122
ARMC8	Mpdu1		fbxa-123
ARMC9	Mpped2		fbxa-124
ARMCX4	Mpv17l2		fbxa-129
ARMCX5	Mrpl13		fbxa-13
ARMCX5-GPRASP2	Mrps10		fbxa-140
ARMCX6	Mrps18b		fbxa-144
ARMH1	Msi2		fbxa-146
ARMH4	Msra		fbxa-161
ARNTL	Mta1		fbxa-168
ARPC1A	Mtap4		fbxa-169
ARPC1B	Mthfd2l		fbxa-175
ARPC2	Mtpap		fbxa-180
ARPC4	Mtx1		fbxa-187
ARPC4-TTLL3	Myl1		fbxa-191
ARPIN	Myo6		fbxa-192
ARPP21	Myst4		fbxa-193
ARRB2	Naa25		fbxa-198
ARRDC1	Naga		fbxa-20
ARRDC3	Nap1l1		fbxa-207
ARSD	Napa		fbxa-209
ARSG	Nbea		fbxa-211
ARSJ	Nbr1		fbxa-212
ARSK	Ncaph2		fbxa-217
ARV1	Ncdn		fbxa-24
ASAH1	Ncoa6		fbxa-33
ASAH2	Ndufa11		fbxa-34
ASAH2B	Ndufb5		fbxa-4
ASAP3	Ndufs6		fbxa-57
ASB1	Necap2		fbxa-70
ASB13	Neu1		fbxa-77
ASB16	Nin		fbxa-8
ASB16-AS1	Nipbl		fbxa-80
ASCC1	Nisch		fbxa-93
ASCC2	Nkiras1		fbxa-94
ASCC3	Nktr		fbxa-97
ASF1B	Nkx2-1		fbxb-8
ASH1L	Nol4		fbxc-44
ASIC1	Nom1		fbxc-46
ASL	Nop58		fbxc-48
ASMT	Nosip		fip-2
ASMTL-AS1	Nova1		fip-6
ASNS	Nprl3		fkb-3
ASNSP1	Nr1h3		flp-14
ASPA	Nr2f1		flp-17
ASPHD1	Nrbp1		flp-18
ASPRV1	Nrd1		flp-19
ASPSCR1	Nrxn3		flp-8
ASTE1	Nsd1		fmo-4
ASXL1	Nt5c2		frpr-13
ASXL3	Nt5c3l		fubl-1
ATAD1	Nub1		gap-2
ATAD2B	Nubp2		glb-24
ATAT1	Nudt9		glb-5
ATCAY	Nup188		glr-6
ATE1	Nup35		gly-11
ATF1	Nxt2		gpx-4
ATF2	Ociad1		grd-15
ATF3	Odf2		grd-2
ATF7IP2	Ogdh		grl-10
ATG12	Ogfr		grl-12
ATG16L2	Ogt		grl-16
ATG4A	Pabpc4		grld-1
ATG4B	Pam		gst-12
ATG4D	Pan3		gst-29
ATG9A	Parp10		gyg-3
ATG9B	Parp6		H10D12.2
ATIC	Patl1		H10D18.6
ATL2	Paxbp1		H10E21.4
ATP11B	Pbrm1		H11L12.1
ATP11C	Pbx3		H23N18.5
ATP13A4	Pcbp2		H28G03.2
ATP1A1-AS1	Pcmt1		H34I24.2
ATP1B3	Pcmtd1		H40L08.2
ATP2A1	Pcnp		his-63
ATP2A2	Pcnx		his-73
ATP2B2	Pcsk5		hpo-10
ATP2B2-IT2	Pcsk7		hpo-15
ATP2C2	Pctk3		hpo-32
ATP4A	Pcyt2		hpo-38
ATP5F1A	Pddc1		hrde-4
ATP5F1E	Pdgfc		hrg-9
ATP5ME	Pdlim7		hrpf-1
ATP5MG	Pecam1		hrpu-1
ATP5O	Peci		hus-1
ATP5PO	Pex5l		icap-1
ATP6AP1	Pfdn5		ifc-2
ATP6AP2	Pfkfb2		ife-5
ATP6V0A1	Phc3		ift-43
ATP6V0A4	Phf1		ilys-3
ATP6V0B	Phf12		ins-13
ATP6V0C	Phf20l1		ins-35
ATP6V0D1	Phip		ints-9
ATP6V0E2-AS1	Phkg2		islo-1
ATP6V1A	Phtf2		JC8.4
ATP6V1B1	Pias2		jmjd-4
ATP6V1B1-AS1	Pigq		K01D12.9
ATP6V1B2	Pik3ap1		K02D10.3
ATP6V1G2	Pilrb1		K02D3.2
ATP6V1G2-DDX39B	Pion		K02E7.1
ATP6V1H	Pisd		K02E7.10
ATP7B	Pkp4		K02E7.6
ATP8A1	Plekha1		K04B12.2
ATP8A2	Plxnb2		K05F6.4
ATP8B1	Pnpla7		K06B9.2
ATP8B3	Ppap2a		K06G5.1
ATP8B4	Ppid		K06G5.3
ATP8B5P	Ppie		K07B1.7
ATP9B	Ppm1k		K07D4.1
ATPAF2	Ppp1ca		K07H8.11
ATR	Ppp1r12b		K07H8.9
ATRIP	Ppp2r2a		K08B4.7
ATRIP-TREX1	Ppp2r2b		K08C9.8
ATRNL1	Ppp4r1		K08D12.3
ATRX	Preb		K08D8.3
ATXN1	Prkag2		K08D8.4
ATXN2	Prkcb		K08D8.7
ATXN2L	Prkrir		K08F11.6
ATXN3	Prpf3		K09F6.4
ATXN7L2	Prpf38b		K09H11.10
AUP1	Prpf39		K09H9.7
AURKB	Prpf39		K10B3.1
AURKC	Prpf40a		K10C9.9
AUTS2	Prpf6		K10G4.13
AVIL	Prr3		K10G4.4
AXDND1	Psma3		K11D12.11
AXIN1	Psmd11		K11D2.5
AZIN1-AS1	Psme4		K11H12.3
AZIN2	Psmg2		K12B6.8
B3GALNT2	Ptbp1		kel-1
B3GALT5-AS1	Ptges2		kgb-2
B3GAT3	Ptpra		kin-1
B3GNTL1	Ptprk		klf-3
B4GALNT1	Pttg1ip		klo-1
B4GALNT4	Pum1		klp-15
B4GALT1-AS1	Pum2		klp-16
B4GALT4	R3hdm1		klp-20
B4GALT7	Rab11a		lact-3
B9D1	Rab4a		lact-4
B9D2	Rab6a		lact-8
BAALC-AS1	Rabgap1l		lec-7
BABAM1	Rabggtb		let-2
BABAM2	Rad52		lgc-31
BAG1	Ralgapa1		lgc-44
BAIAP2	Ranbp17		lgc-6
BAIAP2-DT	Rap1gds1		lgmn-1
BANCR	Rbfox1		lido-14
BANP	Rbfox1		lin-56
BARD1	Rbfox2		linc-125
BASP1P1	Rbfox2		linc-15
BAZ1A	Rbm24		linc-20
BBIP1	Rbm25		linc-29
BBS1	Rbm3		linc-64
BBS2	Rbm39		linc-85
BBS4	Rbm5		linc-9
BBS9	Rbm6		lipl-4
BC024479	Rbm7		lips-14
BCAN	Rce1		lips-16
BCAR1	Rcor3		lips-3
BCAS3	Reck		lips-9
BCAS4	Reep3		lir-1
BCHE	Rev1		lir-2
BCKDHB	Rev3l		lmd-1
BCKDK	Rft1		lon-1
BCL11A	Rfx5		lon-3
BCL2L1	Rfxank		lpr-7
BCL2L12	Rhobtb1		luc-7L
BCL2L13	Ric8b		lys-2
BCL6	Rimkla		lys-3
BCL7B	Rims1		M02B7.2
BCLAF1	Ripk1		M02E1.3
BCLAF3	Rnaseh2a		M02H5.8
BCO2	Rnaset2a		M03A1.8
BCORL1	Rnf13		M03D4.3
BCRP3	Rnf130		M03F4.6
BDH2	Rnf149		M04F3.2
BDNF-AS	Rnf181		M116.2
BDP1	Rnf220		M162.9
BEAN1-AS1	Rnps1		M18.6
BECN1	Rock1		mab-7
BEND5	Rpl10a		mai-1
BEST3	Rpl12		mam-2
BET1	Rpl13a		math-14
BFAR	Rpl17		math-21
BGLAP	Rpl3		math-27
BHLHB9	Rpl37		math-3
BHLHE40-AS1	Rps10		math-43
BHMT2	Rps12		mek-5
BICD1	Rps19		memb-1
BICDL1	Rps19bp1		memb-2
BICRA	Rps3		micu-1
BIN3	Rps6		mig-38
BIN3-IT1	Rps6ka3		mir-238
BIRC5	Rps6kb1		mir-4938
BIRC6	Rps6kc1		miro-3
BISPR	Rps9		mlt-9
BLACAT1	Rpsa		mltn-2
BLID	Rragb		mltn-4
BLMH	Rsbn1		mob-2
BLNK	Rsf1		moe-3
BLOC1S1	Rsrc2		mrpl-23
BLOC1S1-RDH5	Rufy2		mter-4
BLOC1S3	Runx1t1		mtl-2
BLOC1S5	Runx2		mtq-2
BLOC1S5-TXNDC5	Safb2		nas-21
BLOC1S6	Sarnp		nas-29
BMI1	Sat1		nas-3
BMP1	Sbf2		nas-39
BMP5	Scaf11		nbet-1
BMS1P1	Scaf8		nep-4
BMS1P14	Scai		nhr-101
BMS1P2	Scmh1		nhr-104
BMS1P20	Scn1a		nhr-109
BMS1P4	Scn2a1		nhr-110
BNIP2	Scn8a		nhr-133
BOC	Scn8a		nhr-135
BOD1L1	Sdhaf2		nhr-151
BOLA2_locus1	Sec11c		nhr-177
BOLA2-SMG1P6	Sec24a		nhr-194
BOLA2B_locus1	Sec61a2		nhr-195
BOLA3-AS1	Secisbp2		nhr-210
BORCS8	Senp1		nhr-220
BORCS8-MEF2B	Senp5		nhr-227
BPHL	Sept11		nhr-238
BPTF	Setd2		nhr-240
BRAF	Setd3		nhr-5
BRAT1	Setd5		nhr-50
BRCA1	Sf1		nhr-87
BRCA2	Sf3b1		nlp-31
BRD1	Sf3b3		nlp-34
BRD2	Sfrs10		nlp-50
BRD3OS	Sfrs11		nlp-51
BRD4	Sfswap		nmat-1
BRD8	Sfswap		nono-1
BRD9	Sgms1		nos-2
BRE-AS1	Sh2b3		nrde-4
BREA2	Sh3kbp1		nspc-18
BRF2	Shmt2		nspc-20
BRIP1	Sirt1		nspc-9
BRMS1	Sirt7		nstp-9
BRMS1L	Slc12a2		ntp-1
BRPF3	Slc15a4		nxf-1
BRSK2	Slc1a3		nxt-1
BRWD1	Slc20a1		oac-32
BSDC1	Slc25a12		odc-1
BTBD1	Slc25a3		oig-5
BTBD19	Slc25a36		orc-4
BTBD2	Slc26a6		osm-1
BTBD7	Slc38a2		pals-23
BTBD8	Slc40a1		parg-1
BTG1	Slc4a10		pat-10
BTN2A1	Slc4a2		pbo-6
BTN2A2	Slc7a2		pes-8
BTN2A3P	Slc7a6os		pgp-1
BTN3A2	Slc8a3		pgs-1
BUD23	Slc9a8		phip-1
BYSL	Smarca2		phm-2
C10orf113	Smarcad1		pho-13
C10orf143	Smcr7l		picd-1
C10ORF28	Smek1		pik-1
C10orf71-AS1	Smg1		pkc-2
C10orf76	Smg5		pms-2
C11orf49	Smg7		polh-1
C11orf53	Smndc1		pqbp-1.2
C11orf54	Smurf2		pqn-32
C11orf74	Snap25		pqn-68
C11ORF8	Snrnp70		pqn-70
C11orf80	Snrpa1		pst-2
C11orf91	Snrpb		ptp-3
C12orf29	Snx13		ptr-16
C12orf42	Snx4		pud-3
C12orf43	Socs7		qua-1
C12orf54	Son		R01B10.6
C12orf73	Sox5		R02D3.8
C14orf178	Sp3		R03D7.2
C15orf38-AP3S2	Spag9		R04B3.3
C15orf40	Speg		R05D3.3
C16orf45	Spns1		R05G6.4
C16orf46	Spopl		R06C1.4
C16orf58	Srek1		R06C7.2
C16orf86	Srgap1		R07A4.4
C17orf100	Srgap3		R07B1.5
C17orf49	Srpk2		R07B1.6
C17orf50	Srrm1		R07B1.7
C17orf75	Srrm2		R07E5.4
C18orf32	Srrm3		R07H5.11
C19orf26	Srrm4		R09D1.9
C19orf42	Srrt		R10D12.13
C19orf44	Srsf11		R10E8.1
C19orf47	Srsf2		R10E8.3
C19orf48	Srsf3		R10E8.4
C19orf53	SRSF3		R10E8.7
C19orf54	Srsf4		R119.1
C1orf109	SRSF4		R119.5
C1orf112	Srsf5		R11H6.6
C1orf143	Srsf6		R12C12.8
C1orf159	SRSF6		R12E2.14
C1orf194	Srsf7		R12E2.15
C1orf220	Srsf8		R148.7
C1orf226	Srsf9		R186.1
C1orf50	St18		R74.2
C1orf52	St7		rab-19
C1orf61	Stard3		rbm-25
C1QTNF3	Stau2		rbm-3.2
C1QTNF3-AMACR	Stoml2		rbm-39
C1QTNF5	Strada		rbm-5
C1QTNF9	Stradb		rfth-1
C1RL-AS1	Stxbp5		rib-1
C2	Supt6h		rig-6
C20orf203	Supv3l1		rla-2
C21orf58	Surf1		rml-3
C21orf59-TCP10L	Surf2		rnf-113
C21orf62-AS1	Syt6		rnp-7
C21orf63	Taf15		rol-1
C22orf25	Tank		rol-8
C22orf34	Tapt1		rpl-33
C22orf39	Tarbp2		rpl-7A
C2CD3	Tatdn1		rpn-6.2
C2CD4D-AS1	Tatdn2		rsp-1
C2orf27A	Tbrg4		rsp-2
C2orf42	Tcerg1		rsp-5
C2orf68	Tcf12		rsp-6
C2orf73	Tcf7l2		rsp-7
C2orf81	Tcirg1		rsp-8
C2orf92	Tdrd3		rsr-1
C3	Tecr		rtcb-1
C3orf32	Tfip11		sams-3
C3orf33	Tfpt		sav-1
C3orf62	Thoc1		scbp-2
C3orf67-AS1	Thoc2		seip-1
C3P1	Thoc3		set-28
C4A	Thrap3		seu-1
C4B_2_locus1	Thyn1		sip-1
C4B_locus1	Tia1		skpo-2
C4BPB	Tial1		skr-11
C4orf36	Tk2		skr-3
C4orf46	Tlk1		slo-2
C4orf47	Tm9sf4		smd-1
C5orf17	Tmbim4		smg-1
C5orf22	Tmbim6		smg-3
C5orf24	Tmem11		smg-4
C5orf56	Tmem149		smg-5
C5orf63	Tmem164		sna-1
C5orf64	Tmem183a		snpc-3.3
C6orf136	Tmem208		sodh-1
C6orf141	Tmem214		spch-3
C6orf163	Tmem39a		spds-1
C6orf48	Tmem47		spe-44
C6orf52	Tmem57		sphk-1
C7orf25	Tmem8		spp-2
C7orf26	Tmem87a		sqt-3
C7orf43	Tnpo3		srp-5
C7orf50	Toe1		srr-3
C7orf55-LUC7L2	Tom1l2		srw-85
C7orf61	Tomm34		ssq-2
C8orf31	Top3b		sss-2
C8orf34	Tpcn1		stip-1
C8orf37-AS1	Tpi1		stl-1
C8orf58	Tpm1		str-216
C8orf76	Tpm2		sulp-8
C9	Tpm3		sup-12
C9orf135	Tpp2		svh-5
C9orf3	Tpra1		swp-1
C9orf85	Tprgl		sym-4
CA2	Tpst2		T01C8.3
CA4	Tra2a		T01D1.4
CA5A	Tra2a		T01D1.8
CA7	Tra2b		T01E8.8
CABP4	Tra2b		T01H8.2
CACNA1A	Trim24		T02G5.11
CACNA1D	Trim46		T02G5.4
CACNA1H	Trmt1		T03D8.6
CACNA2D4	Trmt6		T03E6.8
CACNB2	Trnau1ap		T03F1.11
CACNB3	Trp53bp1		T03G6.1
CACNB4	Trub2		T05F1.2
CADM1	Tsg101		T05H10.3
CADPS	Tsku		T05H4.10
CALB2	Ttc33		T06D10.3
CALCA	Ttc39c		T06E6.10
CALCOCO1	Tufm		T06G6.11
CALCOCO2	Tug1		T06G6.6
CALD1	Txnrd1		T07C12.12
CALHM2	U2af1		T07C4.12
CALHM6	U2af2		T07D10.3
CALM2	Uap1l1		T07D10.8
CALML3-AS1	Ubap2		T07F10.5
CALML4	Ube2d3		T07G12.3
CALR3	Ube2h		T07G12.8
CAMK1	Ube2k		T08A9.6
CAMK2B	Ube2n		T08B2.4
CAMK2D	Ubl5		T08B2.5
CAMKV	Ubr3		T08D2.2
CAMTA1	Ubr4		T08E11.1
CAMTA2	Ubr5		T08E11.8
CAND1.11	Ufc1		T08G3.4
CANT1	Ufsp2		T09B4.3
CAP2	Uggt1		T09F3.4
CAPN10	Uhrf1bp1l		T09F5.12
CAPN12	Upf2		T11F8.2
CAPN3	Use1		T12B5.9
CAPN7	Usp24		T13F2.4
CAPRIN2	Usp34		T15B7.17
CAPS2	Usp7		T16A9.3
CAPZA2	Uvrag		T16G1.3
CARD14	Vcan		T16G1.5
CARD19	Vkorc1l1		T16H12.1
CARD8	Vps11		T19C9.8
CARD9	Vps29		T19D12.2
CARF	Vps41		T20D4.10
CARM1	Vps8		T20D4.13
CARMIL1	Vwc2l		T20D4.17
CARMIL2	Wdfy2		T20D4.20
CARMN	Wdpcp		T20D4.9
CARNMT1	Wdr43		T20G5.15
CARS	Wdr45l		T22C8.4
CARS2	Wdr82		T23E1.2
CASC1	Wdyhv1		T23F11.6
CASC15	Wiz		T23F2.3
CASC19	Wsb1		T23G7.2
CASC2	Wtap		T24C2.5
CASC3	Xdh		T24C4.4
CASC4	Xpnpep3		T24C4.5
CASC8	Xpo1		T24D5.6
CASD1	Xpo4		T24F1.7
CASP12	Xpo6		T25B2.4
CASP16P	Xpo7		T25D10.1
CASP17P	Ythdf3		T25G12.1
CASP2	Ywhab		T25G12.2
CASP8	Yy1		T26C11.9
CASP9	Zc3h14		T26H5.4
CAST	Zc3h4		T27E7.10
CASTOR1	Zc3h7a		T28A11.2
CASTOR3	Zcchc6		T28A8.8
CATSPER2	Zcrb1		T28F4.1
CATSPER2P1	Zdhhc16		tag-234
CATSPER3	Zdhhc17		tag-65
CATSPERB	Zdhhc20		tdp-1
CATSPERG	Zdhhc3		tnc-2
CATSPERZ	Zfand5		tnt-3
CBARP	Zfc3h1		tofu-1
CBLB	Zfp143		toh-1
CBLC	Zfp280d		tos-1
CBLL1	Zfp326		tric-1B.1
CBR3-AS1	Zfp384		trpl-1
CBR4	Zfp385a		try-10
CBWD1	Zfp410		tsen-34
CBWD2	Zfp523		tsp-1
CBWD3	Zfp553		tsp-2
CBWD5	Zfp655		ttr-25
CBWD5_locus1	Zfp821		ttx-1
CBWD5_locus2	Zfyve19		uad-2
CBWD6	Zmat5		ubc-14
CC2D1A	Zmynd8		ugt-31
CC2D2A	Znhit1		ugt-60
CC2D2B	Znrf2		ugt-64
CCAR1	Zranb1		ugt-7
CCAT1	Zrsr2		unc-33
CCDC113	Zswim6		unc-43
CCDC115	Zyx		unc-54
CCDC12	Zzef1		ung-1
CCDC13-AS1			vit-3
CCDC137			vps-22
CCDC138			W01A8.8
CCDC14			W02F12.1
CCDC144A			W03D2.6
CCDC144B			W03F9.2
CCDC144CP			W03G11.3
CCDC144NL-AS1			W03H9.2
CCDC146			W04A4.2
CCDC148			W04A8.2
CCDC150			W05G11.2
CCDC155			W05H12.2
CCDC159			W06A11.1
CCDC162P			W06A11.4
CCDC163			W06A7.4
CCDC17			W07E6.5
CCDC174			W09B6.4
CCDC175			W09C5.7
CCDC18			W09G12.10
CCDC18-AS1			W09G3.1
CCDC180			W09G3.7
CCDC183			wrt-1
CCDC191			wrt-8
CCDC196			wsp-1
CCDC198			xbp-1
CCDC24			Y102A11A.5
CCDC25			Y102A5C.2
CCDC28B			Y102A5C.35
CCDC30			Y102A5C.5
CCDC32			Y102A5C.6
CCDC38			Y105C5A.15
CCDC39			Y105C5B.15
CCDC47			Y105C5B.20
CCDC57			Y105C5B.5
CCDC59			Y105E8A.28
CCDC61			Y105E8A.32
CCDC66			Y106G6D.5
CCDC7			Y106G6D.6
CCDC74A			Y110A7A.7
CCDC74B			Y111B2A.10
CCDC84			Y111B2A.21
CCDC88A			Y111B2A.25
CCDC88C			Y111B2A.27
CCDC90B			Y113G7B.14
CCDC91			Y116A8A.10
CCHCR1			Y116A8C.9
CCL23			Y17G9A.3
CCM2			Y17G9A.91
CCNB1IP1			Y17G9B.4
CCNC			Y17G9B.8
CCND2-AS1			Y18D10A.22
CCNDBP1			Y18H1A.9
CCNG1			Y20C6A.1
CCNH			Y22D7AL.11
CCNI			Y22D7AL.4
CCNJL			Y32F6A.6
CCNL1			Y32G9A.10
CCNL2			Y32G9A.13
CCNO			Y32H12A.6
CCNQ			Y34F4.7
CCNT2			Y37A1B.7
CCNT2-AS1			Y37B11A.3
CCNYL2			Y37E11B.1
CCPG1			Y37H2A.16
CCS			Y37H2A.18
CCSER1			Y37H2A.7
CCSER2			Y37H2B.1
CCT5			Y37H9A.4
CCT6P1			Y38A10A.11
CCT6P3			Y38F1A.4
CCZ1P-OR7E38P			Y38H6C.9
CD22			Y39A3B.3
CD244			Y39A3CL.7
CD27			Y39B6A.21
CD27-AS1			Y39B6A.34
CD274			Y39B6A.40
CD276			Y39B6A.43
CD2AP			Y39B6A.49
CD300LF			Y39C12A.2
CD320			Y39D8A.1
CD37			Y39E4B.14
CD38			Y39G10AR.9
CD40			Y40A1A.3
CD55			Y40C5A.4
CD58			Y41E3.11
CD59			Y42G9A.1
CD6			Y43F11A.6
CD68			Y43F8B.2
CD7			Y43F8B.23
CD96			Y43F8B.9
CD99L2			Y45F10D.10
CD99P1			Y46E12BL.2
CDADC1			Y46G5A.43
CDAN1			Y47G6A.22
CDC14A			Y47H10A.4
CDC14B			Y47H10A.6
CDC23			Y48B6A.16
CDC25B			Y48C3A.5
CDC27			Y48E1B.8
CDC37			Y48E1C.1
CDC42BPA			Y48G1BL.4
CDC73			Y48G1BM.6
CDCA3			Y49A10A.1
CDCA7			Y50D4A.5
CDCP2			Y50D4B.4
CDH13			Y51F10.2
CDH16			Y53C10A.1
CDH19			Y53C12A.6
CDH2			Y53F4B.25
CDH26			Y53F4B.27
CDH3			Y53G8AR.5
CDHR2			Y54G11A.7
CDHR3			Y54G2A.32
CDIP1			Y54G2A.50
CDIPTOSP			Y55B1BL.1
CDK10			Y55F3AM.21
CDK11A			Y55F3BR.10
CDK14			Y55F3C.13
CDK15			Y56A3A.6
CDK19			Y57A10A.1
CDK3			Y57A10A.2
CDK5RAP2			Y57A10A.3
CDK5RAP3			Y57A10A.4
CDK7			Y57A10A.6
CDKL4			Y57A10A.7
CDKN2A-DT			Y57G11C.36
CDKN2B-AS1			Y57G11C.9
CDO1			Y57G7A.8
CDPF1			Y58A7A.3
CDR2			Y5H2B.1
CDRT3			Y60A3A.19
CDRT4			Y60A3A.21
CEACAM19			Y61A9LA.12
CEACAM3			Y61A9LA.3
CEBPZOS			Y62E10A.19
CECR2			Y66H1A.8
CECR7			Y67D2.4
CELF1			Y67H2A.9
CELF2			Y68A4A.13
CELF3			Y69A2AR.1
CELF4			Y69A2AR.12
CELF5			Y6G8.2
CELF6			Y6G8.5
CELSR3			Y71A12B.14
CENPA			Y71A12B.19
CENPC			Y71F9AL.4
CENPH			Y71G12B.25
CENPJ			Y71H2AM.14
CENPK			Y71H2B.11
CENPM			Y73B3A.18
CENPO			Y73B3A.2
CENPS			Y73B3A.20
CENPS-CORT			Y73B3A.21
CENPT			Y73F8A.1173
CENPU			Y73F8A.32
CENPV			Y73F8A.37
CEP120			Y75B12A.1
CEP126			Y75B8A.28
CEP128			Y7A9C.1
CEP162			Y80D3A.11
CEP170P1			Y80D3A.9
CEP192			Y80D4G.1
CEP250			Y82E9BL.9
CEP290			Y82E9BR.2
CEP41			Y82E9BR.25
CEP57			Y82E9BR.5
CEP57L1			yars-1
CEP63			yars-2
CEP68			zak-1
CEP76			ZC123.1
CEP78			ZC196.1
CEP83			ZC196.5
CEP89			ZC239.6
CEP95			ZC262.2
CEP97			ZC262.4
CEPT1			ZC328.5
CERKL			ZC449.2
CERS5			ZC449.4
CERS6-AS1			ZC513.2
CES1P1			ZC581.3
CES2			zip-11
CES3			zip-12
CES5AP1			zip-2
CETN4P			zip-5
CFAP20			ZK1025.1
CFAP206			ZK1025.3
CFAP221			ZK105.1
CFAP298			ZK1055.5
CFAP299			ZK1055.6
CFAP44			ZK1127.12
CFAP45			ZK1128.1
CFAP47			ZK1225.7
CFAP52			ZK1240.2
CFAP57			ZK1240.3
CFAP61			ZK1240.9
CFAP69			ZK1320.11
CFAP99			ZK180.3
CFB			ZK185.1
CFDP1			ZK185.5
CFHR3			ZK228.4
CFI			ZK265.7
CFL2			ZK470.2
CFLAR			ZK546.14
CGRRF1			ZK546.7
CHCHD10			ZK637.6
CHCHD7			ZK662.8
CHD1			ZK678.3
CHD1L			ZK686.1
CHD2			ZK816.4
CHD4			ZK856.11
CHD5			ZK896.4
CHD6
CHD7
CHD9
CHEK1
CHEK2
CHEK2P2
CHERP
CHFR
CHGA
CHIC1
CHID1
CHKA
CHKB
CHKB-CPT1B
CHL1
CHL1-AS2
CHML
CHMP1B2P
CHMP3
CHMP4A
CHN1
CHN2
CHORDC1
CHP1
CHPF2
CHPT1
CHRD
CHRNA10
CHRNA2
CHRNA3
CHRNA4
CHRNA7
CHRNB2
CHRNB4
CHRND
CHST5
CHSY1
CHTF18
CHUK
CHURC1
CHURC1-FNTB
CIAO3
CIB1
CIB2
CIC
CIDEA
CIDECP1
CIITA
CINP
CIRBP
CIRH1A
CISD2
CKB
CKLF
CKLF-CMTM1
CKMT1B
CKMT2-AS1
CLASP1
CLASP2
CLASRP
CLBA1
CLCA4
CLCC1
CLCN2
CLCN6
CLDN11
CLDN12
CLDN15
CLDN7
CLEC2D
CLEC4A
CLEC4E
CLEC4GP1
CLEC7A
CLHC1
CLIC5
CLIP4
CLK1
CLK4
CLMN
CLN3
CLN5
CLN6
CLN8
CLPB
CLPX
CLRN1
CLRN1-AS1
CLTA
CLTB
CLTCL1
CLUAP1
CLUHP3
CLYBL
CMAHP
CMAS
CMC1
CMC2
CMPK1
CMPK2
CMTM1
CMTR1
CNBD2
CNDP1
CNEP1R1
CNIH1
CNIH2
CNIH3
CNIH4
CNKSR2
CNNM1
CNOT1
CNOT10
CNOT2
CNOT6L
CNOT9
CNPPD1
CNPY1
CNPY2
CNPY3
CNPY3-GNMT
CNTD1
CNTD2
CNTLN
CNTN2
CNTNAP1
CNTNAP3B
CNTNAP4
CNTROB
COA1
COBLL1
COCH
COG1
COG4
COG6
COG7
COG8
COIL
COL11A1
COL13A1
COL21A1
COL24A1
COL25A1
COL27A1
COL28A1
COL4A3
COL4A3BP
COL6A4P2
COL9A1
COLEC11
COMMD10
COMMD2
COMMD3
COMMD3-BMI1
COMMD4
COMMD7
COMT
COP1
COPB1
COPS4
COPS6
COPS7A
COPS7B
COPS8
COPZ1
COPZ2
COQ2
COQ7
COQ8B
COQ9
CORO1B
CORO7
CORO7-PAM16
CORT
COX10
COX11
COX16
COX17
COX20
COX6A1
COX7A2
COX7A2L
COX8A
CP
CPA2
CPA6
CPAMD8
CPB2-AS1
CPLANE1
CPM
CPNE1
CPNE7
CPSF4
CPSF7
CPT1B
CPT1C
CPT2
CPZ
CRABP1
CRACR2A
CRADD
CRAMP1
CRAT
CRB1
CRCP
CREB1
CREB3L4
CREBZF
CRELD1
CRELD2
CRHR1
CRIP1
CRIP2
CRIPAK
CRLF2
CRNDE
CROCCP2
CROCCP3
CRTC2
CRYBB2P1
CRYGN
CRYL1
CRYM
CRYM-AS1
CRYZL1
CRYZL2P
CRYZL2P-SEC16B
CS
CSAD
CSF1R
CSGALNACT1
CSGALNACT2
CSNK1D
CSNK1E
CSNK1G1
CSNK1G2
CSPP1
CSRNP3
CSTF1
CTAGE4
CTAGE8
CTBP1-DT
CTBP2
CTBS
CTC1
CTD-3080P12.3
CTDNEP1
CTDSP2
CTDSPL
CTDSPL2
CTNNA1
CTNNAL1
CTNND1
CTNND2
CTNS
CTRL
CTSA
CTSD
CTSH
CTSL3P
CTSS
CTTNBP2
CUL3
CUL9
CUTALP
CUTC
CUX2
CUZD1
CWC25
CWF19L1
CWF19L2
CXorf65
CYB561A3
CYB561D2
CYB5RL
CYBC1
CYFIP2
CYMP
CYP1B1-AS1
CYP20A1
CYP21A2
CYP26A1
CYP27B1
CYP2A6
CYP2A7
CYP2B6
CYP2C8
CYP2D6_locus1
CYP2D6_locus2
CYP2D7_locus1
CYP2D7_locus2
CYP2E1
CYP2G1P
CYP2J2
CYP2R1
CYP2S1
CYP2T1P
CYP3A43
CYP3A5
CYP46A1
CYP4A11
CYP4B1
CYP4F12
CYP4F2
CYP4F24P
CYP4F3
CYP4F35P
CYP4F62P
CYTH1
CYTOR
CYYR1
CZ1P-ASNS
D2HGDH
D4WSU53E
DAB2
DAGLB
DAO
DAPK1
DAPK1-IT1
DAPK2
DARS-AS1
DAW1
DAZAP2
DBF4B
DBNDD2
DBNL
DCAF1
DCAF10
DCAF11
DCAF13P3
DCAF15
DCAF16
DCAF17
DCAF5
DCAF6
DCAF7
DCAF8
DCBLD1
DCDC1
DCK
DCLK2
DCLRE1C
DCP1B
DCP2
DCST1
DCST2
DCT
DCTD
DCTN1
DCTN1-AS1
DCTN2
DCTN5
DCTN6
DCUN1D2
DCUN1D3
DCUN1D4
DCUN1D5
DDB2
DDHD2
DDI2
DDIT3
DDN-AS1
DDX11
DDX12P
DDX17
DDX19A
DDX19B
DDX20
DDX23
DDX25
DDX27
DDX31
DDX39A
DDX39B
DDX3X
DDX3Y
DDX41
DDX42
DDX46
DDX47
DDX49
DDX5
DDX50
DDX52
DDX55
DDX56
DDX60
DEAF1
DECR1
DECR2
DEDD2
DEF8
DEFB119
DEK
DENND1A
DENND1C
DENND3
DENND4C
DENND5A
DENND5B
DEPDC1B
DEPDC4
DEPDC5
DERA
DERL2
DESI2
DET1
DFFA
DFFB
DGCR10
DGCR5
DGCR6
DGCR9
DGKA
DGKH
DGKZ
DGLUCY
DGUOK
DHDH
DHODH
DHPS
DHRS1
DHRS11
DHRS4L1
DHRS4L2
DHRS7B
DHRSX
DHX29
DHX30
DHX34
DHX35
DHX36
DHX40
DHX58
DHX8
DHX9
DIABLO
DIAPH1
DICER1-AS1
DIO1
DIO3OS
DIRC3
DIS3
DIS3L2
DISC1
DISC1-IT1
DISC1FP1
DKC1
DKFZP586I1420
DLD
DLEC1
DLEU1
DLEU2
DLG1
DLG2
DLG3
DLG4
DLG5
DLGAP1
DLGAP1-AS1
DLGAP1-AS5
DLGAP2
DLST
DLX6-AS1
DMAC2
DMAC2L
DMBT1
DMBT1P1
DMKN
DMPK
DMRTC1
DMRTC1B
DMTF1
DMWD
DNA2
DNAAF1
DNAAF4
DNAAF4-CCPG1
DNAH1
DNAH10
DNAH14
DNAH17-AS1
DNAJA3
DNAJB12
DNAJB14
DNAJB2
DNAJB5
DNAJB6
DNAJC1
DNAJC10
DNAJC12
DNAJC13
DNAJC14
DNAJC16
DNAJC17
DNAJC18
DNAJC19
DNAJC21
DNAJC24
DNAJC25
DNAJC25-GNG10
DNAJC27
DNAJC27-AS1
DNAJC4
DNAJC5
DNAJC7
DNAJC8
DNAJC9-AS1
DNAL1
DNASE1
DNHD1
DNLZ
DNM1
DNM1L
DNM1P46
DNM1P50
DNM3
DNM3-IT1
DNMT3A
DNPEP
DNTTIP2
DOC2GP
DOCK10
DOCK4
DOCK5
DOCK7
DOCK8
DOCK9
DOLPP1
DONSON
DOT1L
DPAGT1
DPEP2
DPH1
DPH2
DPH6-DT
DPM1
DPP10
DPP3
DPP4
DPP7
DPP8
DPP9
DPY19L2
DPY19L2P1
DPY19L2P2
DPY19L3
DPY19L4
DPY30
DQX1
DRAIC
DRAM1
DRAM2
DRC1
DRC7
DRD5P2
DRG1
DRG2
DRICH1
DROSHA
DSCAML1
DSCR1
DSCR10
DSCR8
DSE
DSG2-AS1
DSIPI
DST
DSTNP2
DTD2
DTNB
DTNBP1
DTWD1
DTWD2
DTX2
DTX2P1-UPK3BP1-PMS2P11
DTYMK
DUOX1
DUS2
DUS3L
DUS4L
DUSP10
DUSP12
DUSP13
DUSP18
DUSP19
DUXAP10
DUXAP8
DUXAP9
DVL3
DXO
DYM
DYNC1LI2
DYNC2LI1
DYNLRB2
DYRK4
DZANK1
DZIP1
DZIP3
E2F4
E4F1
EAF1
EAF2
EAPP
EARS2
EBAG9
EBF4
EBLN2
EBLN3P
EBPL
ECD
ECH1
ECHDC1
ECHDC2
ECRP
ECSCR
ECSIT
EDC3
EDDM13
EDEM2
EDRF1
EDRF1-AS1
EEF1AKMT1
EEF1AKMT3
EEF1DP3
EEF1E1
EEF1E1-BLOC1S5
EEF2K
EEF2KMT
EFCAB1
EFCAB11
EFCAB14
EFCAB2
EFCAB5
EFEMP2
EFHC1
EFL1
EFNB2
EFTUD2
EGFEM1P
EGFL7
EGFL8
EGLN2
EHD2
EHMT1
EI24
EIF1AD
EIF2A
EIF2B2
EIF2B3
EIF2B4
EIF2C3
EIF3D
EIF3E
EIF3G
EIF3H
EIF3J-DT
EIF3M
EIF4A1
EIF4A2
EIF4G1
EIF4G2
EIF6
EIPR1
ELAC1
ELAVL3
ELFN2
ELL2
ELL3
ELMO1
ELMOD3
ELMSAN1
ELOVL2-AS1
ELOVL6
ELP1
ELP2
ELP4
ELP5
ELP6
EMBP1
EMC10
EMC2
EMC3
EMC3-AS1
EMC4
EMD
EME1
EML1
EML2
EML2-AS1
EML3
EML5
EML6
ENC1
ENDOV
ENGASE
ENKD1
ENKUR
ENO1
ENO2
ENO3
ENOSF1
ENPP1
ENPP3
ENSA
ENTPD1
ENTPD1-AS1
ENTPD4
ENTPD7
ENY2
EP400P1
EPB41
EPB41L2
EPB41L4A
EPB41L4A-AS1
EPB41L5
EPC1
EPG5
EPHA1-AS1
EPHA10
EPHA6
EPHB1
EPM2A
EPN3
EPOR
EPS15
EPS15L1
EPS8L1
EPS8L2
ERAL1
ERAP2
ERBB2
ERC1
ERC2
ERCC2
ERCC3
ERCC6L2
ERCC8
ERGIC1
ERGIC3
ERI1
ERI2
ERI3
ERICH1
ERICH6-AS1
ERLIN1
ERMP1
ERRFI1
ERVK13-1
ERVK3-1
ESAM
ESCO1
ESR2
ESRRB
ESS2
ESYT3
ETAA1
ETFA
ETHE1
ETNK1
ETV1
EVA1B
EVA1C
EVC2
EVL
EWSAT1
EXD3
EXOC3
EXOC3L4
EXOC6
EXOG
EXOSC1
EXOSC2
EXOSC3
EXOSC8
EXTL3-AS1
EYA1
EYA3
EZH1
EZH2
F10
F11R
F8
FAAH
FAAH2
FAAHP1
FAAP100
FAAP20
FAAP24
FABP3
FABP6
FADS1
FAHD2CP
FAM106A
FAM106B
FAM106CP
FAM111A-DT
FAM118A
FAM120A
FAM120AOS
FAM122C
FAM126B
FAM129C
FAM131B
FAM133B
FAM135A
FAM135B
FAM138A
FAM138C
FAM138F
FAM13A
FAM13B
FAM149B1
FAM151B
FAM153A
FAM153B
FAM153C
FAM156A
FAM156B
FAM157B
FAM160B2
FAM161A
FAM163A
FAM167A-AS1
FAM169A
FAM170A
FAM171A2
FAM172A
FAM177A1
FAM178A
FAM183A
FAM185A
FAM185BP
FAM186B
FAM193A
FAM193B
FAM198B-AS1
FAM19A2
FAM204A
FAM20A
FAM214A
FAM216A
FAM219B
FAM21EP
FAM221A
FAM222A-AS1
FAM225A
FAM226A
FAM226B
FAM227B
FAM228A
FAM228B
FAM230B
FAM230H
FAM238B
FAM239A
FAM239B_locus1
FAM239B_locus2
FAM24B
FAM24B-CUZD1
FAM25A
FAM3A
FAM45A
FAM47E
FAM47E-STBD1
FAM53B-AS1
FAM53C
FAM66A
FAM66B
FAM66C
FAM66E
FAM69B
FAM71D
FAM71E1
FAM72C
FAM74A1_locus2
FAM74A1_locus3
FAM74A4
FAM74A6_locus1
FAM74A6_locus2
FAM76B
FAM78B
FAM83A-AS1
FAM84A
FAM84B
FAM86B1
FAM86B2_locus1
FAM86B2_locus2
FAM86B3P
FAM86C1
FAM86C2P
FAM86DP
FAM86EP
FAM86FP
FAM86HP
FAM86JP
FAM91A1
FAM92A
FAM95B1
FAM95B1_locus1
FAM95B1_locus2
FAM95C
FAM9B
FAN1
FANCA
FANCB
FANCD2
FANCG
FANCI
FAP
FAR1
FAR2P1
FAR2P2
FARSA
FARSB
FAS
FASTKD1
FASTKD3
[truncated: 6,048 more rows]
